1 **RELATIONSHIP BETWEEN PARENTAL AGE AND SEVERITY OF OROFACIAL CLEFTS**

2 Olawale Adamson<sup>1</sup>, Abimibola V. Oladugba<sup>2</sup>, Azeez Alade<sup>3,4</sup>, Waheed O. Awotoye<sup>5</sup>, Tamara Busch<sup>5</sup>,  
3 Mary Li<sup>5</sup>; Joy Olotu<sup>6</sup>, Veronica C. Sule<sup>7</sup>, Azeez Fashina<sup>1</sup>, James Olutayo <sup>1</sup>, Mobolanle O. Ogunlewe <sup>1</sup>,  
4 Wasiu L. Adeyemo<sup>1</sup>, Azeez Butali<sup>4,5</sup>

5

6 <sup>1</sup> Department of Oral and Maxillofacial Surgery, University of Lagos, Lagos, Nigeria

7 <sup>2</sup> Department of Biostatistics, University of Nigeria, Nsukka, Nigeria.

8 <sup>3</sup> Department of Epidemiology, College of Public Health, University of Iowa, Iowa City, IA, USA.

9 <sup>4</sup>Department of Oral Pathology, Radiology and Medicine, College of Dentistry, University of Iowa,

10 <sup>5</sup>Iowa Institute of Oral Health Research, College of Dentistry, University of Iowa, Iowa City, IA, USA

11 Iowa City, IA, USA

12 <sup>6</sup>Department of Anatomy, University of Port Harcourt, Port Harcourt, Nigeria.

13 <sup>7</sup>Department of Operative Dentistry, College of Dentistry, University of Iowa.

14

15

16 **Corresponding author**

17 A. Butali, Department of Oral Pathology, Radiology and Medicine / Iowa Institute for Oral Health

18 Research, College of Dentistry, University of Iowa, Butali Laboratory, ML2198, 500 Newton Road, Iowa

19 City, IA 52242, USA. Email: [azeez-butali@uiowa.edu](mailto:azeez-butali@uiowa.edu) Fax: 319-384-1169. Tel: 319-335-8980.

20

21

22

23 **ABSTRACT**

24 **OBJECTIVES:** This study aims to investigate the relationship between paternal age, maternal age, and  
25 both on the severity of orofacial clefts.

26 **DESIGN:** This was a retrospective study of cases which were subjects clinically diagnosed with non-  
27 syndromic cleft lip and/or palate (CL/P). Data was obtained from the AFRICRAN project database on  
28 Nigerian non-syndromic orofacial cleft cases.

29 **SETTING:** The samples for cases in this study were obtained at the Cleft clinic of Oral and  
30 Maxillofacial surgery at the Lagos University Teaching Hospital, Lagos.

31 **OUTCOME:** Primary outcome measure is severity of orofacial clefts and secondary outcome measure  
32 is to evaluate the effect of parental age in determining the incidence of left or right sided orofacial clefts.

33 **RESULTS:** There is no statistical significant association between type of CL ± P and parental age in  
34 young fathers (p=0.93). When old fathers are considered, percentage of complete (more severe) CL ± P  
35 cases increases especially in old mothers and this was statistically significant (p=0.036). In old fathers,  
36 the risk of CL ± P is increased (OR: 2.66, CI: 1.04-6.80) and also there is increased risk of developing  
37 right sided CL ± P (OR: 1.61, CI: 1.0-2.59). There is reduced risk of isolated cleft palate in young  
38 fathers (OR: 0.36, CI: 0.07-1.71) but the risk increases when considering complete types (more severe)  
39 of isolated cleft palates (OR: 1.63, CI: 0.71-3.7)

40 **CONCLUSION:** The study shows a higher risk of CL ± P is associated with increase father's age.

41

42 **Keywords:** parental age, severity, orofacial cleft

43

44

## 45 INTRODUCTION

46 Birth defects are reported to contribute significantly to infant morbidity and mortality globally (1).  
47 Orofacial clefts (OFC) are amongst the most common craniofacial birth defects with a prevalence of  
48 1:700 live births (2). OFC can be syndromic or non-syndromic with syndromic accounting for 70% of  
49 all OFC (Dixon et al., 2011). The phenotypic presentation of OFC differs and ranges from cleft lip  
50 (CL), cleft lip and palate (CLP) and cleft palate only (CPO). The aetiology of OFC is considered to be  
51 multifactorial with polygenic, environmental, epigenetics and interaction between genetics and  
52 environmental factors playing a role (3). Environmental factors implicated in aetiology of OFC include  
53 smoking, alcohol, metabolic syndromes such as diabetes mellitus and maternal obesity as well as  
54 parental age.

55 Parental age has been proposed as a possible risk factor for OFC.(4) Previous studies conducted on the  
56 association between parental age and incidence of birth defects have yielded inconsistent results(5)(6,7).  
57 It is generally reported that advanced age may predispose chromosomes to irreversible changes and  
58 genetic alterations. In a study by Sartorelli et al.,(8) the frequency of numerical and structural  
59 chromosomal aberrations (acentric fragments and complex radial figures) was significantly greater in  
60 chromosomes of older donors when compared with those of the younger group. Many autosomal  
61 dominant diseases have been shown to be associated with increasing paternal age.(9) Crouzon  
62 syndrome, Apert syndrome and Pfeiffer syndrome are all autosomal dominant craniosynostosis disorders  
63 that can be caused by mutations in the FGFR2 gene occurring in a normal father's germ line. All the  
64 FGFR2 mutations were associated with increased paternal age and molecularly proven to be of paternal  
65 origin.(10) A Danish population-based study of 1,920 OFC affected births of 1,489,014 live births  
66 concluded that paternal age is associated with CLP, independently of maternal age.(11). It is worthy to

67 note that the fetal congenital anomalies attributed to advanced paternal age is low in absolute terms and  
68 though there is a relationship, it is not causal in effect.(9)

69

70 There are studies suggesting that maternal age and parity might play an important role in the  
71 development of certain isolated birth defects.(12). Kim et al (13) reported that risk of trisomy 21,  
72 trisomy 18, triple X syndrome, and all aneuploidies showed a significant increase related to increase in  
73 maternal age. For Down syndrome, the risk of maternal age did not change when controlling for paternal  
74 age. On the other hand, paternal age effects changed from very large risk to a small sparing risk when  
75 controlling for maternal age.

76

77 There is no clear consensus on the effect of parental age regarding the risk of orofacial clefts though  
78 many studies have reported associations between advanced maternal or paternal age and risk of orofacial  
79 clefts. A study by Bille et al(4) using the population-based Danish Facial Cleft Database, reported that  
80 the influence of maternal and paternal ages on the risk of Cleft lip and/or palate (CL ± P) increases with  
81 the advancing age of the other parent, and that the influence vanishes if the other parent is young. In  
82 contrast, the risk of having a child with cleft palate is influenced only by father's age, not mother's age.  
83 In a study of Brazilians with OFC, Martelli et al(14) reported an association between maternal age and  
84 increased risk for CLP while paternal age risk is not significant.

85 In addition to the fact that the association between parental age and risk of orofacial clefts has been  
86 inconsistent, there is sparse literature on the influence of parental age on the severity of orofacial clefts.  
87 This study aims to investigate the relationship between paternal age, maternal age, and both on the  
88 severity of orofacial clefts. In addition, we plan to evaluate the effect of parental age in determining the  
89 incidence of left or right sided orofacial clefts.

## 90 **MATERIAL AND METHODS**

91 **Study design:** This was a retrospective study in which cases were subjects clinically diagnosed with non-  
92 syndromic cleft lip and/or palate (CL  $\pm$  P). Selection of cases was based on standardized examination  
93 performed by trained Surgeons who participated in the Pan-African Association of Cleft lip and palate  
94 network for repair of orofacial clefts in Africa. Clinical information including detailed description of the  
95 phenotype, parental age and clinical photographs were recorded in the database.

96 **Study location:** The samples for cases in this study were obtained at the Cleft clinic of Oral and  
97 Maxillofacial surgery at the Lagos University Teaching Hospital, Lagos. The Research and ethics  
98 committee of Lagos University Teaching Hospital was informed, and ethical approval obtained before  
99 commencing the study.

### 100 **Method:**

101 Data was obtained from the AFRICRAN project database on Nigerian non-syndromic orofacial cleft  
102 cases. All infants born with orofacial clefts were clinically examined with the overall goal to measure and  
103 characterize the craniofacial morphology and development, and data on parental age were also included.  
104 The infants were classified according to whether they were unilateral (left [L] or right [R] sided) or  
105 bilateral, as well as the severity of their cleft graded.

106 For the current analysis regarding the influence of parental age on cleft severity, the groups with CL  $\pm$  P  
107 and isolated cleft palate were considered two separate populations because of their different embryological  
108 origins. The CL  $\pm$  P population comprised: unilateral incomplete cleft lip (UICL), bilateral incomplete  
109 cleft lip (BICL), unilateral complete cleft lip (UCCL), bilateral complete cleft lip (BCCL), unilateral  
110 incomplete cleft lip and palate (UICLP), bilateral incomplete cleft lip and palate (BICLP), unilateral  
111 complete cleft lip and palate (UCCLP) and BCCLP (bilateral complete cleft lip and palate).

112 In the CL ± P population, the data were grouped by the analysis of the influence of severity. For this  
113 purpose, the previously described subgroups were combined as follows: IC (incomplete/less severe clefts  
114 = UICL+BICL+UICLP+BICLP) vs CC (complete/ more severe clefts =  
115 UCCL+BCCL+UCCLP+BCCLP), as well as L vs R-sided cleft (for this analysis, only unilateral clefts  
116 (UCL ± P = UICL+UCCL+UICLP+UCCLP) were included).

117 The CP population comprised of: incomplete cleft palate (ICP) and complete cleft palate (CCP)

118 The parental age was classified into young father, old father or young mother, old mother based on the  
119 median ages of the parents. The risk of orofacial clefts was analyzed based on these groups.

120 Statistical analysis: For the primary analysis, a binary outcome variable was defined with two values (0 =  
121 IC, 1 = CC). Pearson's Chi-square test was applied to analyze the association between parental age and  
122 the severity of orofacial clefts. Based on logistic regression, the relative risk with confidence interval was  
123 calculated between severity of orofacial clefts and parental age.

124

125

126

127

128

129

130

131 **RESULTS:** The total number of non-syndromic orofacial cleft cases analyzed was 267 with 202 CL ± P  
 132 and 65 CP cases. Table 1 shows the parental age distribution of the cleft cases. Young fathers are  
 133 categorized as those below 35 years while old fathers are greater than or equals to 35 years old while  
 134 young mothers are categorized as those below 30 years while old mothers are greater than or equals to 30  
 135 years old.

136 **Table 1: Summary statistics of the age distribution of the father and mother in the data**

|  |                           | CL ± P      |             | CP           |              |
|--|---------------------------|-------------|-------------|--------------|--------------|
|  |                           | fathers age | mothers age | Father's age | Mother's age |
|  | Minimum                   | 20          | 17          | 25           | 19           |
|  | 1 <sup>st</sup> Quartile  | 32.00       | 26.00       | 32.00        | 26.00        |
|  | Median                    | 35.00       | 30.00       | 35.00        | 29.00        |
|  | Mean                      | 35.48       | 29.51       | 35.52        | 29.09        |
|  | 3 <sup>rd</sup> Quartiles | 38.00       | 32.00       | 39.00        | 32.00        |
|  | Maximum                   | 54          | 43          | 48           | 42           |

137

138

139

140

141 **CLEFT LIP AND PALATE**

142 Generally, there are more complete cleft CL ± P than incomplete cases (Table 2). There is no statistical  
143 significant association between type of CL ± P and parental age in young fathers (p=0.93). When old  
144 fathers are considered, percentage of complete CL ± P cases increases especially in old mothers and this  
145 was statistically significant at (p=0.036). These findings indicate that old father-old mother combination  
146 is more associated with more severe CL ± P.

147

148

149

150

151

152

153

154

155

156

157

158

159

160



161 **Table 2: Shows the relationship of parental age to cleft lip and palate cases.**

| Fathers age based on median |                             |       |            | Type of Cleft lip |       | Total | p-value |        |
|-----------------------------|-----------------------------|-------|------------|-------------------|-------|-------|---------|--------|
|                             |                             |       |            | IC                | CC    |       |         |        |
| < 35                        | Mothers age based on median | < 30  | Count      | 13                | 42    | 55    | 0.930   |        |
|                             |                             |       | % of Total | 16.9%             | 54.5% | 71.4% |         |        |
|                             |                             | > 30  | Count      | 5                 | 17    | 22    |         |        |
|                             |                             |       | % of Total | 6.5%              | 22.1% | 28.6% |         |        |
|                             |                             | Total |            | Count             | 18    | 59    |         | 77     |
|                             |                             |       |            | % of Total        | 23.4% | 76.6% |         | 100.0% |
| ≥35                         | Mothers age based on median | < 30  | Count      | 12                | 32    | 44    | 0.036   |        |
|                             |                             |       | % of Total | 9.6%              | 25.6% | 35.2% |         |        |
|                             |                             | > 30  | Count      | 10                | 71    | 81    |         |        |
|                             |                             |       | % of Total | 8.0%              | 56.8% | 64.8% |         |        |
|                             |                             | Total |            | Count             | 22    | 103   |         | 125    |
|                             |                             |       |            | % of Total        | 17.6% | 82.4% |         | 100.0% |

162

163

164 **Severity of CL ± P**

165 There is no increased risk of CL ± P in young fathers (OR: 1.05, CI: 0.3-3.4) and there is no increased  
 166 risk for any subtype of CL ± P (table 3). In old fathers, the risk of CL ± P is increased (OR: 2.66, CI:  
 167 1.04-6.80). There is also increased risk for incomplete CL ± P in old fathers (OR: 2.209, CI: 1.04-4.70)  
 168 but the risk reduces when complete CL ± P was considered (OR: 0.83, CI: 0.68-1.01). These show that  
 169 the risk of CL ± P increases with paternal age which is higher in less severe form of incomplete CL ± P  
 170 (Table 3).

171 **Table 3: Relative risk of severity of CL ± P in relation to parental age.**

| Risk Estimate               |                                                          |       |                         |       |
|-----------------------------|----------------------------------------------------------|-------|-------------------------|-------|
| Fathers age based on median |                                                          | Value | 95% Confidence Interval |       |
|                             |                                                          |       | Lower                   | Upper |
| < 35                        | Odds Ratio for Mothers age based on median (< 30 / > 30) | 1.052 | .325                    | 3.409 |
|                             | For cohort Type of Cleft lip = IC                        | 1.040 | .421                    | 2.571 |
|                             | For cohort Type of Cleft lip = CC                        | .988  | .754                    | 1.295 |
| ≥ 35                        | Odds Ratio for Mothers age based on median (< 30 / > 30) | 2.663 | 1.043                   | 6.797 |
|                             | For cohort Type of Cleft lip = IC                        | 2.209 | 1.039                   | 4.699 |
|                             | For cohort Type of Cleft lip = CC                        | .830  | .680                    | 1.012 |
| Total                       | Odds Ratio for Mothers age based on median (< 30 / > 30) | 1.982 | .974                    | 4.035 |
|                             | For cohort Type of Cleft lip = IC                        | 1.734 | .973                    | 3.090 |
|                             | For cohort Type of Cleft lip = CC                        | .875  | .761                    | 1.006 |

172 **Risk of left or right sided cleft in unilateral CL ± P**

173 There is no associated increase in risk of unilateral CL ± P for either left or right side in young fathers  
 174 (Table 4). In old fathers, there is increased risk of developing right sided CL ± P (OR: 1.61, CI: 1.0-  
 175 2.59) and the risk of developing left sided clefts reduces indicating that mother’s age is a more  
 176 associated with left-sided clefts in old fathers.

177

178 **Table 4: Relative risk of Left or right sided Unilateral CL ± P**

| Risk Estimate               |                                                          |       |                         |       |
|-----------------------------|----------------------------------------------------------|-------|-------------------------|-------|
| Fathers age based on median |                                                          | Value | 95% Confidence Interval |       |
|                             |                                                          |       | Lower                   | Upper |
| < 35                        | Odds Ratio for Mothers age based on median (< 30 / > 30) | 1.045 | .352                    | 3.104 |
|                             | For cohort Cleft Lip Details = Left                      | 1.026 | .548                    | 1.919 |
|                             | For cohort Cleft Lip Details = Right                     | .981  | .618                    | 1.558 |
| ≥ 35                        | Odds Ratio for Mothers age based on median (< 30 / > 30) | .442  | .193                    | 1.011 |
|                             | For cohort Cleft Lip Details = Left                      | .714  | .493                    | 1.033 |
|                             | For cohort Cleft Lip Details = Right                     | 1.614 | 1.006                   | 2.588 |
| Total                       | Odds Ratio for Mothers age based on median (< 30 / > 30) | .508  | .273                    | .943  |
|                             | For cohort Cleft Lip Details = Left                      | .733  | .549                    | .978  |
|                             | For cohort Cleft Lip Details = Right                     | 1.443 | 1.028                   | 2.025 |

179

180 **Severity of bilateral CL ± P**

181 In bilateral CL ± P, there is a slight risk of bilateral CL ± P in young fathers (OR: 1.14, CI: 0.7-16.94)

182 (Table 5). There was two-fold increase in risk of bilateral CL ± P in old fathers (OR: 2.0, CI: 0.11-36.9)

183 and this was more predominant in incomplete bilateral CL ± P (OR: 1.87, CI: 0.13-26.1).

184

185 **Table 5: Relative risk of bilateral CL ± P**

| <b>Risk Estimate</b>        |                                                          |       |                         |        |
|-----------------------------|----------------------------------------------------------|-------|-------------------------|--------|
| Fathers age based on median |                                                          | Value | 95% Confidence Interval |        |
|                             |                                                          |       | Lower                   | Upper  |
| < 35                        | Odds Ratio for Mothers age based on median (< 30 / > 30) | 1.143 | .077                    | 16.947 |
|                             | For cohort Type of Cleft lip = IC                        | 1.091 | .184                    | 6.476  |
|                             | For cohort Type of Cleft lip = CC                        | .955  | .382                    | 2.387  |
| ≥ 35                        | Odds Ratio for Mothers age based on median (< 30 / > 30) | 2.000 | .108                    | 36.954 |
|                             | For cohort Type of Cleft lip = IC                        | 1.875 | .134                    | 26.161 |
|                             | For cohort Type of Cleft lip = CC                        | .938  | .698                    | 1.259  |
| Total                       | Odds Ratio for Mothers age based on median (< 30 / > 30) | 2.857 | .477                    | 17.110 |
|                             | For cohort Type of Cleft lip = IC                        | 2.368 | .524                    | 10.698 |
|                             | For cohort Type of Cleft lip = CC                        | .829  | .605                    | 1.135  |

186

187

188 **CLEFT PALATE**

189 There is reduced risk of isolated cleft palate in young fathers (OR: 0.36, CI: 0.07-1.71) but the risk  
 190 increases when considering complete cleft palates (OR: 1.63, CI: 0.71-3.7) though this was not  
 191 statistically significant (Table 6). This indicates that maternal age is more associated with less severe  
 192 cleft palate while paternal age is associated with more severe cleft palate.

193

194 **Table 6: Risk of parental age and severity of cleft palate only**

| Risk Estimate               |                                                           |       |                         |       |
|-----------------------------|-----------------------------------------------------------|-------|-------------------------|-------|
| Fathers age based on median |                                                           | Value | 95% Confidence Interval |       |
|                             |                                                           |       | Lower                   | Upper |
| <35                         | Odds Ratio for Mothers age based on median<br>(<30 / >30) | .359  | .075                    | 1.714 |
|                             | For cohort Populations = ICP                              | .583  | .267                    | 1.276 |
|                             | For cohort Populations = CCP                              | 1.625 | .713                    | 3.706 |
| ≥35                         | Odds Ratio for Mothers age based on median<br>(<30 / >30) | .593  | .149                    | 2.365 |
|                             | For cohort Populations = ICP                              | .781  | .395                    | 1.545 |
|                             | For cohort Populations = CCP                              | 1.316 | .646                    | 2.680 |
| Total                       | Odds Ratio for Mothers age based on median<br>(<30 / >30) | .445  | .165                    | 1.200 |
|                             | For cohort Populations = ICP                              | .663  | .398                    | 1.106 |
|                             | For cohort Populations = CCP                              | 1.492 | .904                    | 2.462 |

195

196 **DISCUSSION**

197 This study evaluates the relationship between parental age and severity of cleft using data derived from  
198 Nigerian patients with cleft lip and palate. To our knowledge, this is the first of such study to be  
199 conducted in an African population. This study attempts to go further than just linking parental age with  
200 risk of OFC, but highlighting the effects on severity and also on left or right selection of unilateral cleft  
201 lip and palate cases.

202 This study shows that increased parental age is associated with more severe CL ± P cases as  
203 combination of older parents produce more severe cases. This aligns with various studies that have  
204 reported increased congenital malformations in older parents.(6,15). A population-based study on  
205 Danish Facial Cleft Database, reported the influence of maternal and paternal ages on the risk of cleft lip  
206 with or without cleft palate increases with the advancing age of the other parent, and that the influence  
207 vanishes if the other parent is young.(7) Though there has been varying reports on whether the maternal  
208 or paternal chromosomes are culpable. The exact mechanism of this occurrence has not been elucidated,  
209 though single gene mutations are suggested mechanisms.(11)

210 Also from this study, advanced paternal age is associated with increased risk of less severe unilateral  
211 and bilateral CL ± P. This is in agreement with a similar study by Herman et al(16) that reported that  
212 paternal age increases risk of CL ± P which is more pronounced with advanced maternal age. The  
213 paternal age seems to have a great deal of influence on the prevalence of CL ± P in any population. The  
214 influence of paternal age also spills over in to cleft palate where many studies have reported association  
215 between paternal age and cleft palate.(Martelli *et al.*, 2010; Hoda Badr *et al.*, 2011) In this study,  
216 paternal age is associated with increased risk of more severe cleft palate.

217 Though maternal age has been associated with chromosomal abnormalities in some studies but paternal  
218 age is usually associated with birth defects.(12,13) It is reported in some literature that the risk of birth

219 defects such as heart malformation, other musculoskeletal anomalies, tracheo-oesophageal  
220 fistula/oesophageal atresia, Down's syndrome and other chromosomal anomalies, increases slightly with  
221 advancing paternal age.(5,14). Association between younger fathers and several selected birth defects  
222 like neural tube defects has also been published (18) The association of paternal age with birth defects  
223 has been attributed to accumulation of chromosomal aberrations and mutations during the maturation of  
224 male germ cells.(10,19). The amount of DNA damage in sperm of men aged 36–57 is three times that of  
225 men 35 years and less.(11)

226 Prevalence and pattern of occurrence of OFC in a given population is expected to fluctuate as the  
227 average parental ages change. Increase occurrence of more severe cleft is expected with advanced  
228 parental ages and this may take a toll on available resources.

### 229 **Strengths and Limitations**

230 The strength of this study is that it is a population-based investigation of a genetically homogeneous  
231 population who has similar environmental exposures. Furthermore, only parents of children with non-  
232 syndromic cleft were included. The limitation of this study is the small sample size and other  
233 environmental factors like socio-economic status of the parents, maternal intake of alcohol and smoking  
234 were not considered

### 235 **Conclusion**

236 Increased parental age is associated with increased risk of OFC. In this study, advanced paternal age is  
237 associated with increased risk of less severe unilateral and bilateral CL ± P but a more severe cleft  
238 palate. Future prospective studies on different populations and also considering other socio-economic  
239 factors may provide more insights into the influence of parental age on occurrence and severity of OFC.

240

241 **ACKNOWLEDGEMENTS**

242 We are grateful to the families who voluntarily participated in this study in Nigeria. We are also  
243 grateful to all the administrative and research staffs, students, nurses and resident doctors who assisted  
244 with participant recruitment, consent, and data collection. This research is supported by the National  
245 Institute of Dental and Craniofacial Research (R00 DE022378 and R01DE028300; A.B.).

246

247

248

249

250

251

252

253

254

255

256

257

258

259

260

261

262



263 **REFERENCES**

- 264 1. Butali A, Adeyemo WL, Mossey PA, Olasoji HO, Onah II, Adebola A, et al. Prevalence of  
265 orofacial clefts in Nigeria. *Cleft Palate-Craniofacial J.* 2014;
- 266 2. Stone C. Cleft Lip and Palate: Etiology, Epidemiology, Preventive and Intervention Strategies.  
267 *Anat Physiol.* 2013;04(03):2–6.
- 268 3. Wong FK, Hägg U. An update on the aetiology of orofacial clefts. *Hong Kong Med J.*  
269 2004;10(5):331–6.
- 270 4. Bille C, Skytthe A, Vach W, Knudsen LB, Andersen AMN, Murray JC, et al. Parent’s age and the  
271 risk of oral clefts. *Epidemiology.* 2005;16(3):311–6.
- 272 5. Yang Q, Wen SW, Leader A, Chen XK, Lipson J, Walker M. Paternal age and birth defects: How  
273 strong is the association? *Hum Reprod.* 2007;22(3):696–701.
- 274 6. de Carvalho PHP, Machado RA, Reis SR de A, Martelli DRB, Dias VO, Martelli-Júnior H.  
275 Parental age is related to the occurrence of cleft lip and palate in Brazilian populations. *Brazilian*  
276 *J Oral Sci.* 2016;15(2):167–70.
- 277 7. Leth Jensen B, Kreiborg S, Dahl E, Fogh-Andersen P. Cleft lip and palate in Denmark, 1976-  
278 1981: Epidemiology, variability, and early somatic development. *Cleft Palate J.* 1988;25(3):258–  
279 69.
- 280 8. Sartorelli EMP, Mazzucatto LF, De Pina-Neto JM. Effect of paternal age on human sperm  
281 chromosomes. *Fertil Steril.* 2001;76(6):1119–23.
- 282 9. Nybo Andersen AM, Urhoj SK. Is advanced paternal age a health risk for the offspring? *Fertil*  
283 *Steril.* 2017;107(2):312–8.
- 284 10. Wiener-Megnazi Z, Auslender R, Dirnfeld M. Advanced paternal age and reproductive outcome.  
285 *Asian J Androl.* 2012;14(1):69–76.

- 286 11. Bray I, Gunnell D, Smith GD. Advanced paternal age: How old is too old? *J Epidemiol*  
287 *Community Health*. 2006;60(10):851–3.
- 288 12. Luo YL, Cheng YL, Gao XH, Tan SQ, Li JM, Wang W, et al. Maternal age, parity and isolated  
289 birth defects: A population-based case-control study in Shenzhen, China. *PLoS One*.  
290 2013;8(11):4–9.
- 291 13. Kim YJ, Lee JE, Kim SH, Shim SS, Cha DH. Maternal age-specific rates of fetal chromosomal  
292 abnormalities in Korean pregnant women of advanced maternal age. *Obstet Gynecol Sci*.  
293 2013;56(3):160.
- 294 14. Martelli DRB, da Cruz KW, de Barros LM, Silveira MF, Swerts MSO, Júnior HM. Maternal and  
295 paternal age, birth order and interpregnancy interval evaluation for cleft lip/palate. *Braz J*  
296 *Otorhinolaryngol*. 2010;76(1):107–12.
- 297 15. Harville EW, Wilcox AJ, Lie RT, Vindenes H, Åbyholm F. Cleft lip and palate versus cleft lip  
298 only: Are they distinct defects? *Am J Epidemiol*. 2005;162(5):448–53.
- 299 16. Hermann N V., Darvann TA, Munch A, Krieborg S. Parental age in relation to the severity of  
300 cleft lip and/or palate. *Orthod Craniofacial Res*. 2018;21(4):236–41.
- 301 17. Hoda Badr, Cindy L. Carmack, Deborah A. Kashy, Massimo Cristofanilli and TAR. 基因的改变  
302 NIH Public Access. *Bone*. 2011;23(1):1–7.
- 303 18. Zhu JL, Madsen KM, Vestergaard M, Olesen A V., Basso O, Olsen J. Paternal age and congenital  
304 malformations. *Hum Reprod*. 2005;20(11):3173–7.
- 305 19. Thompson JA. Disentangling the roles of maternal and paternal age on birth prevalence of down  
306 syndrome and other chromosomal disorders using a Bayesian modeling approach. *BMC Med Res*  
307 *Methodol*. 2019;19(1):1–8.
- 308
